# Supplementary material
Source: HighWire-hosted journal article supplement (https://tobaccocontrol.bmj.com/highwire/filestream/165005/field_highwire_adjunct_files/0/tc-2022-057428supp001_data_supplement.pdf)
Supplement: tc-2022-057428supp001_data_supplement.pdf [file tc-2022-057428supp001_data_supplement.pdf]

## SUPPLEMENTARY TABLES

**Supplementary Table 1. Prevalence of menthol use overall and by sociodemographic characteristics and smoking behaviours at Waves 1-3, among adult smokers who participated in Waves 1-3 of the 2020-2021 ITC Netherlands Surveys\*, weighted, unadjusted (N=1,322)<sup>1</sup>**

| Variable                          | Wave 1    |            |                   | Wave 2    |            |                   | Wave 3    |            |                   |
|-----------------------------------|-----------|------------|-------------------|-----------|------------|-------------------|-----------|------------|-------------------|
|                                   | n         | %          | 95% CI            | n         | %          | 95% CI            | n         | %          | 95% CI            |
| <b>Overall menthol use</b>        | <b>99</b> | <b>7.5</b> | <b>(6.2, 9.1)</b> | <b>45</b> | <b>3.6</b> | <b>(2.7, 4.9)</b> | <b>39</b> | <b>3.4</b> | <b>(2.5, 4.7)</b> |
| <b>Region</b>                     |           |            |                   |           |            |                   |           |            |                   |
| West                              | 52        | 9.2        | (7.1, 11.9)       | 23        | 4.5        | (3.0, 6.7)        | 18        | 3.9        | (2.5, 6.2)        |
| North                             | 11        | 7.7        | (4.3, 13.6)       | 7         | 4.3        | (2.0, 8.7)        | 6         | 4.3        | (1.9, 9.5)        |
| East                              | 22        | 7.2        | (4.7, 10.7)       | 7         | 2.5        | (1.2, 5.3)        | 7         | 2.6        | (1.2, 5.5)        |
| South                             | 14        | 4.1        | (2.4, 6.9)        | 8         | 2.6        | (1.3, 5.1)        | 8         | 2.7        | (1.3, 5.4)        |
| <b>Sex</b>                        |           |            |                   |           |            |                   |           |            |                   |
| Male                              | 29        | 3.9        | (2.7, 5.6)        | 14        | 1.9        | (1.1, 3.3)        | 10        | 1.4        | (0.8, 2.6)        |
| Female                            | 70        | 12.3       | (9.8, 15.3)       | 31        | 5.8        | (4.1, 8.2)        | 29        | 6.1        | (4.2, 8.8)        |
| <b>Age group (years)</b>          |           |            |                   |           |            |                   |           |            |                   |
| 18-24                             | 13        | 9.1        | (5.4, 15.1)       | 5         | 3.9        | (1.6, 9.1)        | 6         | 5.4        | (2.4, 11.6)       |
| 25-39                             | 51        | 12.0       | (9.2, 15.5)       | 24        | 6.0        | (4.1, 8.9)        | 19        | 5.0        | (3.2, 7.8)        |
| 40-54                             | 22        | 6.8        | (4.5, 10.1)       | 12        | 4.0        | (2.3, 7.0)        | 11        | 4.0        | (2.2, 7.1)        |
| 55+                               | 13        | 3.3        | (1.9, 5.7)        | 4         | 1.1        | (0.4, 2.9)        | 3         | 0.7        | (0.2, 2.2)        |
| <b>Household income</b>           |           |            |                   |           |            |                   |           |            |                   |
| Low                               | 30        | 7.4        | (5.2, 10.5)       | 12        | 3.0        | (2.1, 5.8)        | 6         | 1.7        | (0.8, 3.9)        |
| Moderate                          | 34        | 7.2        | (5.1, 9.9)        | 15        | 3.5        | (2.1, 5.8)        | 16        | 4.2        | (2.6, 6.9)        |
| High                              | 16        | 9.8        | (6.0, 15.5)       | 11        | 6.3        | (3.5, 11.3)       | 11        | 6.9        | (3.8, 12.3)       |
| Not stated                        | 19        | 7.1        | (4.5, 10.9)       | 7         | 3.1        | (1.4, 6.3)        | 6         | 2.6        | (1.1, 5.8)        |
| <b>Education</b>                  |           |            |                   |           |            |                   |           |            |                   |
| Low                               | 21        | 4.7        | (3.1, 7.1)        | 6         | 1.5        | (0.6, 3.2)        | 9         | 2.4        | (1.2, 4.6)        |
| Moderate                          | 39        | 7.0        | (5.1, 9.5)        | 19        | 3.6        | (2.3, 5.6)        | 16        | 3.1        | (1.9, 5.0)        |
| High                              | 38        | 13.8       | (10.1, 18.5)      | 19        | 7.4        | (4.8, 11.5)       | 14        | 6.3        | (3.7, 10.4)       |
| Not stated                        | 1         | 14.8       | (2.0, 59.4)       | 1         | 14.8       | (2.0, 59.4)       | 0         | 0.0        | -                 |
| <b>Smoking frequency</b>          |           |            |                   |           |            |                   |           |            |                   |
| Non-daily                         | 25        | 12.7       | (8.7, 18.3)       | 8         | 6.2        | (3.1, 12.1)       | 9         | 7.4        | (3.8, 13.9)       |
| Daily                             | 74        | 6.6        | (5.3, 8.3)        | 32        | 3.0        | (2.1, 4.2)        | 28        | 2.9        | (2.0, 4.2)        |
| <b>Usual brand FM or RYO</b>      |           |            |                   |           |            |                   |           |            |                   |
| Factory-made (FM)                 | 96        | 11.2       | (9.2, 13.6)       | 43        | 5.4        | (4.0, 7.3)        | 38        | 5.4        | (3.9, 7.3)        |
| Roll-your-own (RYO)               | 3         | 0.6        | (0.2, 1.9)        | 2         | 0.5        | (0.1, 2.0)        | 1         | 0.2        | (0.0, 1.6)        |
| <b>Heaviness of smoking index</b> |           |            |                   |           |            |                   |           |            |                   |
| Lower (0-3)                       | 84        | 8.3        | (6.7, 10.1)       | 32        | 3.6        | (2.5, 5.1)        | 34        | 4.1        | (2.9, 5.7)        |
| Higher (4-6)                      | 14        | 4.8        | (2.8, 8.0)        | 7         | 2.5        | (1.2, 5.3)        | 3         | 1.2        | (0.4, 3.7)        |
| Mean score                        | 98        | 1.5        | (1.2, 1.8)        | 39        | 1.6        | (1.1, 2.1)        | 37        | 1.6        | (1.1, 2.0)        |
| <b>Plans to quit</b>              |           |            |                   |           |            |                   |           |            |                   |
| No plans                          | 6         | 4.2        | (1.8, 9.1)        | 4         | 2.6        | (1.0, 6.7)        | 5         | 4.2        | (1.7, 9.9)        |
| Within next 6 months              | 40        | 11.9       | (8.8, 15.9)       | 18        | 5.4        | (3.4, 8.5)        | 8         | 2.7        | (1.3, 5.4)        |
| In the future, >6 months          | 40        | 7.0        | (5.1, 9.5)        | 18        | 3.4        | (2.2, 5.5)        | 19        | 3.9        | (2.5, 6.1)        |
| <b>Ever tried to quit</b>         |           |            |                   |           |            |                   |           |            |                   |
| No                                | 20        | 6.8        | (4.4, 10.3)       | 8         | 2.4        | (1.2, 4.8)        | 10        | 3.2        | (1.7, 6.0)        |
| Yes                               | 79        | 7.8        | (6.3, 9.7)        | 37        | 4.1        | (3.0, 5.7)        | 29        | 2.5        | (2.5, 5.1)        |

\*Wave 1 (pre-ban): February-March 2020; Menthol ban: May 2020; Wave 2 (post-ban): September-November 2020; Wave 3 (post-ban): June-July 2021; <sup>1</sup> Excludes n=4 respondents who reported "don't know" as their usual brand flavour.

**Supplementary Table 2. Wave 1 characteristics of adult smokers who participated in Waves 1-3 (cohort sample) compared to those who participated in Wave 1 but were lost to follow-up at Waves 2 or 3 of the ITC Netherlands 2020-2021 Surveys\*, weighted<sup>1</sup>, unadjusted**

| Variable                      | Cohort sample<br>(N=1,326) |      |              | Lost to follow-up<br>(N=741) |      |              | p-value          |
|-------------------------------|----------------------------|------|--------------|------------------------------|------|--------------|------------------|
|                               | n                          | %    | 95% CI       | n                            | %    | 95% CI       |                  |
| <b>Region</b>                 |                            |      |              |                              |      |              |                  |
| West                          | 547                        | 46.7 | (46.2, 47.1) | 312                          | 46.2 | (45.7, 46.8) | 0.887            |
| North                         | 154                        | 11.4 | (11.2, 11.7) | 86                           | 11.8 | (11.4, 12.1) |                  |
| East                          | 291                        | 21.1 | (20.7, 21.4) | 151                          | 20.0 | (19.6, 20.5) |                  |
| South                         | 334                        | 20.8 | (20.5, 21.1) | 192                          | 22.0 | (21.6, 22.4) |                  |
| <b>Sex</b>                    |                            |      |              |                              |      |              |                  |
| Male                          | 751                        | 58.9 | (56.2, 61.5) | 378                          | 52.2 | (48.6, 55.9) | <b>0.004</b>     |
| Female                        | 575                        | 41.1 | (38.5, 43.8) | 363                          | 47.7 | (44.1, 51.4) |                  |
| <b>Age group (years)</b>      |                            |      |              |                              |      |              |                  |
| 18-24                         | 166                        | 10.9 | (9.4, 12.6)  | 165                          | 20.3 | (17.6, 23.2) | <b>&lt;0.001</b> |
| 25-39                         | 418                        | 26.8 | (24.6, 29.2) | 254                          | 30.8 | (27.6, 34.2) |                  |
| 40-54                         | 363                        | 29.1 | (26.7, 31.7) | 154                          | 23.1 | (20.0, 26.4) |                  |
| 55+                           | 379                        | 33.2 | (30.6, 35.9) | 168                          | 25.8 | (22.6, 29.3) |                  |
| <b>Household income</b>       |                            |      |              |                              |      |              |                  |
| Low                           | 278                        | 30.0 | (27.6, 32.6) | 189                          | 25.2 | (22.2, 28.5) | <b>0.011</b>     |
| Moderate                      | 258                        | 35.3 | (32.7, 38.0) | 135                          | 18.6 | (15.9, 21.6) |                  |
| High                          | 493                        | 12.2 | (10.5, 14.1) | 230                          | 30.7 | (27.4, 34.2) |                  |
| Not stated                    | 297                        | 22.5 | (20.3, 24.9) | 187                          | 25.4 | (22.4, 28.8) |                  |
| <b>Education</b>              |                            |      |              |                              |      |              |                  |
| Low                           | 462                        | 37.3 | (34.5, 39.9) | 304                          | 42.6 | (39.0, 46.3) | <b>&lt;0.001</b> |
| Moderate                      | 572                        | 40.0 | (37.4, 42.7) | 317                          | 40.3 | (36.8, 43.9) |                  |
| High                          | 285                        | 22.3 | (20.1, 24.7) | 108                          | 15.4 | (12.9, 18.4) |                  |
| Not stated                    | 7                          | 0.5  | (0.2, 1.0)   | 12                           | 1.6  | (0.9, 2.7)   |                  |
| <b>Smoking frequency</b>      |                            |      |              |                              |      |              |                  |
| Non-daily                     | 202                        | 14.6 | (12.8, 16.6) | 108                          | 13.8 | (11.5, 16.5) | 0.642            |
| Daily                         | 1124                       | 85.4 | (83.4, 87.2) | 633                          | 86.2 | (83.5, 88.5) |                  |
| <b>Usual brand FM or RYO</b>  |                            |      |              |                              |      |              |                  |
| FM                            | 875                        | 63.9 | (61.2, 66.6) | 537                          | 71.2 | (67.8, 74.4) | <b>0.001</b>     |
| RYO                           | 446                        | 36.1 | (33.4, 38.8) | 202                          | 28.8 | (25.6, 32.2) |                  |
| <b>HSI</b>                    |                            |      |              |                              |      |              |                  |
| Lower (0-3)                   | 1037                       | 78.4 | (76.0, 80.6) | 583                          | 78.7 | (75.5, 81.2) | 0.853            |
| Higher (4-6)                  | 276                        | 21.6 | (19.4, 24.0) | 147                          | 21.3 | (18.3, 24.5) |                  |
| <b>HSI mean score (0-6)</b>   | 1313                       | 2.2  | (2.1, 2.3)   | 730                          | 2.2  | (2.1, 2.3)   | 0.347            |
| <b>Plans to quit</b>          |                            |      |              |                              |      |              |                  |
| No plans                      | 129                        | 13.0 | (11.0, 15.3) | 62                           | 11.1 | (8.7, 14.0)  | 0.314            |
| Within the next 6 months      | 340                        | 31.7 | (28.9, 34.6) | 213                          | 34.9 | (31.1, 38.9) |                  |
| In the future > 6 months      | 586                        | 55.3 | (52.2, 58.3) | 319                          | 54.0 | (49.9, 58.1) |                  |
| <b>Ever tried to quit</b>     |                            |      |              |                              |      |              |                  |
| No                            | 314                        | 22.9 | (20.7, 25.3) | 183                          | 23.7 | (20.8, 26.9) | 0.699            |
| Yes                           | 1010                       | 77.0 | (74.7, 79.3) | 556                          | 76.3 | (73.1, 78.2) |                  |
| <b>Flavour of usual brand</b> |                            |      |              |                              |      |              |                  |
| No                            | 1223                       | 92.8 | (91.3, 94.1) | 672                          | 91.6 | (89.4, 93.4) | 0.335            |
| Yes                           | 99                         | 7.2  | (5.9, 8.7)   | 65                           | 8.4  | (6.6, 10.6)  |                  |

\*Wave 1 (pre-ban): February-March 2020; Menthol ban: May 2020; Wave 2 (post-ban): September-November 2020; Wave 3 (post-ban): June-July 2021

<sup>1</sup> The sampling weight used in this analysis is designed to make these 2067 respondents representative of the adult (aged 18+) Dutch population of at least monthly cigarette smokers (and smoked at least 100 cigarettes in their lifetime) at the time of wave 1 data collection. The sampling weight used in all other analyses is also designed as such, however also adjusts for attrition between waves 2 and 3, hence, why proportions for the cohort sample varies slightly from Table 1.

FM=factory-made cigarettes; HSI=Heaviness of Smoking Index; RYO=roll-your-own tobacco

**Supplementary Table 3. Changes in prevalence of usual menthol use before and after the menthol ban overall and by sex among adult smokers who participated in Waves 1-3 of the 2020-2021 ITC Netherlands Surveys\*, weighted, adjusted**

| Wave                         | n  | Adj % † | 95% CI      | % diff | 95% CI       | p-value          |
|------------------------------|----|---------|-------------|--------|--------------|------------------|
| <b>Overall (N=1,322)</b>     |    |         |             |        |              |                  |
| Wave 1 (pre-ban)             | 99 | 7.8     | (6.3, 9.4)  |        |              |                  |
| Wave 2 (post-ban)            | 45 | 4.0     | (2.8, 5.2)  | -3.8   | (-5.1, -2.5) | <b>&lt;0.001</b> |
| Wave 3 (post-ban)            | 39 | 4.4     | (3.1, 5.6)  | -3.5   | (-4.9, -2.1) | <b>&lt;0.001</b> |
| <b>Among females (N=575)</b> |    |         |             |        |              |                  |
| Wave 1 (pre-ban)             | 70 | 12.2    | (9.4, 15.0) |        |              |                  |
| Wave 2 (post-ban)            | 31 | 6.5     | (4.4, 8.7)  | -5.7   | (-8.1, -3.3) | <b>&lt;0.001</b> |
| Wave 3 (post-ban)            | 29 | 7.8     | (5.4, 10.3) | -4.4   | (-6.8, -1.9) | <b>&lt;0.001</b> |
| <b>Among males (N=751)</b>   |    |         |             |        |              |                  |
| Wave 1 (pre-ban)             | 29 | 4.3     | (2.7, 5.9)  |        |              |                  |
| Wave 2 (post-ban)            | 14 | 1.9     | (0.8, 2.9)  | -2.4   | (-3.8, -1.0) | <b>&lt;0.001</b> |
| Wave 3 (post-ban)            | 10 | 1.4     | (0.4, 2.3)  | -2.9   | (-4.5, -1.3) | <b>&lt;0.001</b> |

\*Wave 1 (pre-ban): February-March 2020; Menthol ban: May 2020; Wave 2 (post-ban): September-November 2020; Wave 3 (post-ban): June-July 2021

† Generalised estimating equation (GEE) models (family: binomial, link: logit, correlation matrix: exchangeable) adjusted for sex, age, household income, education, plans to quit within the next six months, ever made a quit attempt, HSI (categorical: 0-3; 4-6), except for the respective stratification covariate; Post-estimation margins commands in Stata.

Adj= adjusted; % diff= percent difference

**Supplementary Table 4. Post-ban quit attempt and quit by pre-ban usual menthol use overall and by sex, among respondents who participated in Waves 1-3 of the 2020-2021 ITC Netherlands Surveys\*, weighted, unadjusted (N=1,322)**

| Pre-ban menthol use      | Post-ban quit attempt (Wave 2 or 3) |      |              |        |              | Post-ban quit (Wave 2) |      |              |        |              | Post-ban quit (Wave 3) |      |              |        |              |
|--------------------------|-------------------------------------|------|--------------|--------|--------------|------------------------|------|--------------|--------|--------------|------------------------|------|--------------|--------|--------------|
|                          | n                                   | %    | 95% CI       | % diff | p-value †    | n                      | %    | 95% CI       | % diff | p-value †    | n                      | %    | 95% CI       | % diff | p-value †    |
| <b>Overall (N=1,322)</b> |                                     |      |              |        |              |                        |      |              |        |              |                        |      |              |        |              |
| Menthol                  | 59                                  | 66.9 | (56.2, 76.1) | 17.3   | <b>0.002</b> | 17                     | 17.8 | (11.2, 27.0) | 7.6    | <b>0.025</b> | 26                     | 26.1 | (18.3, 35.8) | 12.0   | <b>0.002</b> |
| Non-menthol              | 504                                 | 49.6 | (46.5, 52.8) |        |              | 127                    | 10.2 | (8.6, 12.1)  |        |              | 175                    | 14.1 | (12.3, 16.2) |        |              |
| <b>Females (N=575)</b>   |                                     |      |              |        |              |                        |      |              |        |              |                        |      |              |        |              |
| Menthol                  | 24                                  | 61.6 | (48.8, 73.0) | 12.8   | 0.065        | 12                     | 17.4 | (5.9, 10.7)  | 9.5    | <b>0.012</b> | 19                     | 26.6 | (17.4, 38.4) | 14.2   | <b>0.002</b> |
| Non-menthol              | 39                                  | 48.8 | (44.0, 53.6) |        |              | 42                     | 7.9  | (5.9, 10.7)  |        |              | 63                     | 12.4 | (9.7, 15.6)  |        |              |
| <b>Males (N=751)</b>     |                                     |      |              |        |              |                        |      |              |        |              |                        |      |              |        |              |
| Menthol                  | 20                                  | 80.3 | (60.3, 91.7) | 30.1   | <b>0.003</b> | 5                      | 18.5 | (7.9, 37.6)  | 6.6    | 0.294        | 7                      | 24.9 | (12.3, 43.9) | 9.5    | 0.175        |
| Non-menthol              | 291                                 | 50.2 | (46.1, 54.4) |        |              | 85                     | 11.9 | (9.7, 14.5)  |        |              | 112                    | 15.4 | (12.9, 18.2) |        |              |

\*Wave 1 (pre-ban): February-March 2020; Menthol ban: May 2020; Wave 2 (post-ban): September-November 2020; Wave 3 (post-ban): June-July 2021

† Chi-square test

% diff= percent difference

**Supplementary Table 5. Main effects overall and by subpopulations and interaction effects between pre-ban usual menthol use and post-ban quit attempt and quit, among respondents who participated in Waves 1-3 of the 2020-2021 ITC Netherlands Surveys\*, weighted, adjusted †**

| Variable                                               | Post-ban quit attempt<br>(Wave 2 or 3) |               |              | Post-ban quit<br>(Wave 2) |               |              | Post-ban quit<br>(Wave 3) |               |              |
|--------------------------------------------------------|----------------------------------------|---------------|--------------|---------------------------|---------------|--------------|---------------------------|---------------|--------------|
|                                                        | aOR†                                   | 95% CI        | p-value      | aOR†                      | 95% CI        | p-value      | aOR†                      | 95% CI        | p-value      |
| <b>Overall (N=1,322)</b>                               |                                        |               |              |                           |               |              |                           |               |              |
| Menthol                                                | 1.89                                   | (1.13, 3.16)  | <b>0.015</b> | 1.61                      | (0.84, 3.08)  | 0.149        | 1.63                      | (0.96, 2.88)  | 0.090        |
| Non-menthol                                            | 1.00                                   |               |              | 1.00                      |               |              | 1.00                      |               |              |
| <b>Sex</b>                                             |                                        |               |              |                           |               |              |                           |               |              |
| <b>Females (N=575)</b>                                 |                                        |               |              |                           |               |              |                           |               |              |
| Menthol                                                | 1.74                                   | (0.89, 3.41)  | 0.103        | 1.88                      | (0.84, 4.19)  | 0.123        | 2.23                      | (1.10, 4.51)  | <b>0.026</b> |
| Non-menthol                                            | 1.00                                   |               |              | 1.00                      |               |              | 1.00                      |               |              |
| <b>Males (N=751)</b>                                   |                                        |               |              |                           |               |              |                           |               |              |
| Menthol                                                | 3.00                                   | (1.07, 8.39)  | <b>0.037</b> | 0.87                      | (0.23, 3.32)  | 0.843        | 0.87                      | (0.26, 2.86)  | 0.818        |
| Non-menthol                                            | 1.00                                   |               |              | 1.00                      |               |              | 1.00                      |               |              |
| <b>Interaction model: menthol x sex<sup>1</sup></b>    |                                        |               | 0.336        |                           |               | 0.233        |                           |               | 0.188        |
| <b>Age</b>                                             |                                        |               |              |                           |               |              |                           |               |              |
| <b>Aged 18-39 years (N=584)</b>                        |                                        |               |              |                           |               |              |                           |               |              |
| Menthol                                                | 3.02                                   | (1.31, 6.97)  | <b>0.009</b> | 1.34                      | (0.62, 2.86)  | 0.455        | 1.32                      | (0.67, 2.60)  | 0.418        |
| Non-menthol                                            | 1.00                                   |               |              | 1.00                      |               |              | 1.00                      |               |              |
| <b>Aged 40+ years (N=742)</b>                          |                                        |               |              |                           |               |              |                           |               |              |
| Menthol                                                | 1.08                                   | (0.51, 2.28)  | 0.843        | 1.80                      | (0.51, 6.38)  | 0.360        | 2.00                      | (0.74, 5.42)  | 0.171        |
| Non-menthol                                            | 1.00                                   |               |              | 1.00                      |               |              | 1.00                      |               |              |
| <b>Interaction model: menthol x age<sup>1</sup></b>    |                                        |               | <b>0.027</b> |                           |               | 0.817        |                           |               | 0.810        |
| <b>Household income</b>                                |                                        |               |              |                           |               |              |                           |               |              |
| <b>Low income (N=278)</b>                              |                                        |               |              |                           |               |              |                           |               |              |
| Menthol                                                | 2.66                                   | (0.55, 12.86) | 0.225        | 2.24                      | (0.44, 11.31) | 0.330        | 1.33                      | (0.30, 5.82)  | 0.702        |
| Non-menthol                                            | 1.00                                   |               |              | 1.00                      |               |              | 1.00                      |               |              |
| <b>Moderate income (N=258)</b>                         |                                        |               |              |                           |               |              |                           |               |              |
| Menthol                                                | 4.06                                   | (0.71, 23.18) | 0.114        | 4.50                      | (1.02, 19.9)  | <b>0.048</b> | 2.79                      | (0.62, 12.52) | 0.180        |
| Non-menthol                                            | 1.00                                   |               |              | 1.00                      |               |              | 1.00                      |               |              |
| <b>High income (N=493)</b>                             |                                        |               |              |                           |               |              |                           |               |              |
| Menthol                                                | 1.39                                   | (0.70, 2.78)  | 0.344        | 0.98                      | (0.40, 2.42)  | 0.973        | 1.18                      | (0.55, 2.53)  | 0.669        |
| Non-menthol                                            | 1.00                                   |               |              | 1.00                      |               |              | 1.00                      |               |              |
| <b>Income not reported (N=297)</b>                     |                                        |               |              |                           |               |              |                           |               |              |
| Menthol                                                | 1.53                                   | (0.38, 6.07)  | 0.547        | 0.63                      | (0.54, 7.47)  | 0.718        | 2.48                      | (0.51, 12.01) | 0.260        |
| Non-menthol                                            | 1.00                                   |               |              | 1.00                      |               |              | 1.00                      |               |              |
| <b>Interaction model: menthol x income<sup>1</sup></b> |                                        |               | 0.937        |                           |               | 0.774        |                           |               | 0.991        |
| <b>Education</b>                                       |                                        |               |              |                           |               |              |                           |               |              |
| <b>Low education (N=462)</b>                           |                                        |               |              |                           |               |              |                           |               |              |
| Menthol                                                | 2.25                                   | (0.57, 8.92)  | 0.248        | 2.05                      | (0.41, 10.36) | 0.385        | 1.56                      | (0.28, 8.58)  | 0.606        |
| Non-menthol                                            | 1.00                                   |               |              | 1.00                      |               |              | 1.00                      |               |              |
| <b>Moderate education (N=572)</b>                      |                                        |               |              |                           |               |              |                           |               |              |

| Variable                                                  | Post-ban quit attempt<br>(Wave 2 or 3) |               |              | Post-ban quit<br>(Wave 2) |              |         | Post-ban quit<br>(Wave 3) |              |         |
|-----------------------------------------------------------|----------------------------------------|---------------|--------------|---------------------------|--------------|---------|---------------------------|--------------|---------|
|                                                           | aOR†                                   | 95% CI        | p-value      | aOR†                      | 95% CI       | p-value | aOR†                      | 95% CI       | p-value |
| Menthol                                                   | 1.85                                   | (0.86, 3.96)  | 0.115        | 1.23                      | (0.40, 3.76) | 0.719   | 1.76                      | (0.73, 4.26) | 0.209   |
| Non-menthol                                               | 1.00                                   |               |              | 1.00                      |              |         | 1.00                      |              |         |
| <b>High education (N=285)</b>                             |                                        |               |              |                           |              |         |                           |              |         |
| Menthol                                                   | 2.53                                   | (1.01, 6.33)  | <b>0.046</b> | 1.30                      | (0.45, 3.81) | 0.628   | 1.69                      | (0.72, 3.96) | 0.225   |
| Non-menthol                                               | 1.00                                   |               |              | 1.00                      |              |         | 1.00                      |              |         |
| <b>Interaction model: menthol x education<sup>1</sup></b> |                                        |               | 0.830        |                           |              | 0.601   |                           |              | 0.757   |
| <b>Smoking frequency</b>                                  |                                        |               |              |                           |              |         |                           |              |         |
| <b>Daily smokers (N=1,124)</b>                            |                                        |               |              |                           |              |         |                           |              |         |
| Menthol                                                   | 2.15                                   | (1.18, 3.93)  | <b>0.012</b> | 1.07                      | (0.41, 2.82) | 0.890   | 1.44                      | (0.72, 2.88) | 0.301   |
| Non-menthol                                               | 1.00                                   |               |              | 1.00                      |              |         | 1.00                      |              |         |
| <b>Non-daily smokers (N=202)</b>                          |                                        |               |              |                           |              |         |                           |              |         |
| Menthol                                                   | 1.12                                   | (0.29, 4.32)  | 0.872        | 2.18                      | (0.71, 6.70) | 0.173   | 1.80                      | (0.56, 5.79) | 0.326   |
| Non-menthol                                               | 1.00                                   |               |              | 1.00                      |              |         | 1.00                      |              |         |
| <b>Interaction model: menthol x frequency<sup>1</sup></b> |                                        |               | 0.077        |                           |              | 0.305   |                           |              | 0.961   |
| <b>Heaviness of smoking index (HSI)</b>                   |                                        |               |              |                           |              |         |                           |              |         |
| <b>Lower HSI (0-3) (N=1,037)</b>                          |                                        |               |              |                           |              |         |                           |              |         |
| Menthol                                                   | 1.65                                   | (0.95, 2.84)  | 0.073        | 1.79                      | (0.91, 3.54) | 0.091   | 1.53                      | (0.83, 2.82) | 0.177   |
| Non-menthol                                               | 1.00                                   |               |              | 1.00                      |              |         | 1.00                      |              |         |
| <b>Higher HSI (4-6) (N=276)</b>                           |                                        |               |              |                           |              |         |                           |              |         |
| Menthol                                                   | 6.97                                   | (1.08, 44.86) | <b>0.041</b> | 0.41                      | (0.05, 3.11) | 0.390   | 2.17                      | (0.48, 9.77) | 0.314   |
| Non-menthol                                               | 1.00                                   |               |              | 1.00                      |              |         | 1.00                      |              |         |
| <b>Interaction model: menthol x HSI<sup>1</sup></b>       |                                        |               | 0.115        |                           |              | 0.360   |                           |              | 0.339   |

\*Wave 1 (pre-ban): February-March 2020; Menthol ban: May 2020; Wave 2 (post-ban): September-November 2020; Wave 3 (post-ban): June-July 2021

† Logistic regression models adjusted for flavour of usual brand, sex, age, household income, education, plans to quit within the next six months, ever made a quit attempt, HSI (categorical: 0-3; 4-6), except for the respective stratification covariate;

<sup>1</sup> Interaction models also adjusted for interaction term of flavour of usual brand x respective covariate.

**Supplementary Table 6. Comparison of the menthol impact in Canada and in the Netherlands****Table 6a. Comparison of sample characteristics**

| Variable                 | Menthol vs non-menthol                                                     |                                                                             |
|--------------------------|----------------------------------------------------------------------------|-----------------------------------------------------------------------------|
|                          | Canada: Chung-Hall et al.                                                  | Netherlands: Kyriakos et al.                                                |
| Region                   | n/a                                                                        | ns                                                                          |
| Sex                      | ns                                                                         | Higher proportion of female menthol smokers, p<.001                         |
| Age group                | Higher proportion of menthol smokers in 18-24 and 25-39 age groups, p=.016 | Higher proportion of menthol smokers in 25-39 age group, p<.001             |
| Ethnicity                | ns                                                                         | n/a                                                                         |
| Household income         | ns                                                                         | ns                                                                          |
| Education                | Higher proportion of menthol smokers in high education group, p=.009       | Higher proportion of menthol smokers in high education group, p<.001        |
| Smoking frequency        | n/a                                                                        | Higher proportion of menthol smokers who smoked non-daily, p=.003           |
| Usual brand (FM, RYO)    | n/a                                                                        | Higher proportion of menthol smokers who smoked FM only cigs, p<.001        |
| HSI (mean)               | ns                                                                         | Higher proportion of menthol smokers with lower nicotine dependence, p<.001 |
| Plans to quit in next 6M | ns                                                                         | Higher proportion of menthol smokers with plans to quit, p=.007             |
| Ever tried to quit       | ns                                                                         | ns                                                                          |
| Time-in-sample           | ns                                                                         | n/a                                                                         |

n/a= not applicable; ns=not significant

**Table 6b. Comparison of post-ban cessation outcomes by pre-ban menthol smoking status**

|                              | Canada: Chung-Hall et al | Netherlands: Kyriakos et al |
|------------------------------|--------------------------|-----------------------------|
| <b>Post-ban quit attempt</b> |                          |                             |
| Pre-ban menthol smokers      | 58.7%                    | 66.9%                       |
| Pre-ban non-menthol smokers  | 49.0%                    | 49.6%                       |
| % diff                       | 9.7                      | 17.3                        |
| Chi-square test p-value      | p<.05                    | .002                        |
| Adjusted Odd's Ratio         | 1.61 (1.03-2.51) †       | 1.89 (1.13-3.16) ††         |
| Logistic regression p-value  | p<.05                    | .015                        |
| <b>Post-ban quit</b>         |                          |                             |
| Pre-ban menthol smokers      | 12.1%                    | 26.1%                       |
| Pre-ban non-menthol smokers  | 5.9%                     | 14.1%                       |
| % diff                       | 6.2                      | 12.0                        |
| Chi-square test p-value      | p<0.05                   | .002                        |
| Adjusted Odd's Ratio         | 1.30 (0.56-3.01) †       | 1.63 (0.96-2.88) ††         |
| Logistic regression p-value  | ns                       | ns                          |

†Logistic regression model adjusted for sex, age, household income, education, plans to quit within the next six months, ever made a quit attempt, HSI (categorical: 0-3; 4-6), ethnicity, time-in-sample; †† Logistic regression model adjusted for sex, age, household income, education, plans to quit within the next six months, ever made a quit attempt, HSI (categorical: 0-3; 4-6).

**Table 6c. Post-ban transitions among pre-ban menthol smokers**

|                                    | Canada: Chung-Hall et al<br>(n=138 pre-ban menthol smokers) | Netherlands: Kyriakos et al<br>(n=99 pre-ban menthol smokers) |
|------------------------------------|-------------------------------------------------------------|---------------------------------------------------------------|
| Still smoking menthol cigarettes   | 19.5%                                                       | 33.0%                                                         |
| Switched to non-menthol cigarettes | 59.1%                                                       | 40.0%                                                         |
| Quit smoking                       | 21.5%                                                       | 26.1%                                                         |

**Supplementary Table 7. Sensitivity analyses of post-ban quit (Wave 3) by pre-ban menthol status overall using different definitions of quitting and controlling for other covariates, among respondents who participated in Waves 1-3 of the 2020-2021 ITC Netherlands Surveys\*, weighted (N=1,322)**

| Pre-ban menthol use                                                        | Post-ban quit (Wave 3) |      |              |              |         |              |         |
|----------------------------------------------------------------------------|------------------------|------|--------------|--------------|---------|--------------|---------|
|                                                                            | n                      | %    | 95% CI       | p-value      | aOR     | 95% CI       | p-value |
| <b>Definition of quitting in the main text<sup>1</sup></b>                 |                        |      |              |              |         |              |         |
| <i>Reported quit or &lt; monthly smoking</i>                               |                        |      |              |              |         |              |         |
| Menthol smoker                                                             | 26                     | 26.1 | (18.3, 35.8) | <b>0.002</b> | 1.63 †  | (0.96, 2.88) | 0.090   |
| Non-menthol smoker                                                         | 175                    | 14.1 | (12.3, 16.2) |              | 1.00    |              |         |
| <b>Other definitions of quitting<sup>2</sup></b>                           |                        |      |              |              |         |              |         |
| <i>Reported quit for no minimum length (excludes &lt; monthly smoking)</i> |                        |      |              |              |         |              |         |
| Menthol smoker                                                             | 19                     | 18.9 | (12.3, 28.1) | 0.052        | 1.35 †  | (0.73, 2.49) | 0.334   |
| Non-menthol smoker                                                         | 150                    | 12.1 | (10.4, 14.1) |              | 1.00    |              |         |
| <i>Reported quit for at least one month</i>                                |                        |      |              |              |         |              |         |
| Menthol smoker                                                             | 16                     | 16.0 | (10.0, 24.8) | 0.160        | 1.29 †  | (0.68, 2.46) | 0.439   |
| Non-menthol smoker                                                         | 139                    | 11.3 | (9.6, 13.2)  |              | 1.00    |              |         |
| <i>Reported quit for over 6 months (long-term quit)</i>                    |                        |      |              |              |         |              |         |
| Menthol smoker                                                             | 11                     | 10.8 | (6.0, 18.7)  | 0.102        | 1.50 †  | (0.71, 3.18) | 0.292   |
| Non-menthol smoker                                                         | 82                     | 6.5  | (5.2, 8.0)   |              | 1.00    |              |         |
| <b>Controlling for other covariates<sup>3</sup></b>                        |                        |      |              |              |         |              |         |
| <i>Reported quit or less than monthly smoking</i>                          |                        |      |              |              |         |              |         |
| Menthol smoker                                                             | 26                     | 26.1 | (18.3, 35.8) | <b>0.002</b> | 1.59 †† | (0.76, 3.35) | 0.220   |
| Non-menthol smoker                                                         | 175                    | 14.1 | (12.3, 16.2) |              | 1.00    |              |         |

\*Wave 1 (pre-ban): February-March 2020; Menthol ban: May 2020; Wave 2 (post-ban): September-November 2020; Wave 3 (post-ban): June-July 2021

<sup>1</sup> In the main text, smokers were defined as those who were currently smoking cigarettes at least monthly, while quitters were defined as those who self-reported having quit or if they were smoking less than monthly. This allowed comparability between this study and ITC Canada study by Chung-Hall et al., 2021.

<sup>2</sup> Additional sensitivity analyses using different definitions of quitting are presented. Statistical significance attenuated for chi-square tests and regression analyses remained not significant. The overall conclusions reported in this study and the implications remain the same.

<sup>3</sup> In the main text we adjusted for the same covariates used in the ITC Canada study by Chung-Hall et al., 2021 (except for ethnicity, which was not measured in the ITC Netherlands Surveys and time-in-sample which was not applicable since all respondents participated in all three waves) for direct comparability. However, in the presented analysis in this Supplementary table, covariates were included (or not) based on an iterative approach that also considered Akaike (AIC) and Bayesian information criteria (BIC). Added covariates included: daily/non-daily smoking; usual cigarette brand factory-made or roll-your-own tobacco. Covariates considered but not included were: household income, and ever made a quit attempt. Heaviness of Smoking Index (HSI) was controlled for as a continuous variable rather than as a categorical variable (0-3; 4-6).

† Logistic regression model adjusted for sex, age, household income, education, plans to quit within the next six months, ever made a quit attempt, HSI (categorical: 0-3; 4-6).

†† Logistic regression model adjusted for sex, age, education, plans to quit within the next six months, and HSI (continuous, 0-6), daily/non-daily smoking, usual cigarette brand factory-made or roll-your-own tobacco
